# Supplementary material
Source: PubMed Central journal article supplement (PMC4886346)
Supplement: NIHMS777648-supplement-01.pdf [file NIHMS777648-supplement-01.pdf]

## SUPPLEMENT 1

### Measures

The Nisonger Child Behavior Rating Form (NCBRF) was used to determine eligibility and clinical improvement as well as one of the primary outcome measures. The Nisonger Child Behavior Rating Form (NCBRF)-Typical IQ provides one prosocial subscale (Positive/Social) and six problem behavior subscales: (a) Conduct Problem, (b) Oppositional Behavior, (c) Hyperactive, (d) Inattentive, (e) Overly Sensitive, and (f) Withdrawn/Dysphoric. The NCBRF has excellent internal consistency, distinguishes between controls and patients with disruptive behavior disorders (DBDs), and its predecessor (for children with developmental disabilities) was highly drug-sensitive. Conduct Problem and Oppositional Behavior map closely to *DSM-IV-TR* symptoms of conduct disorder (CD) and oppositional defiant disorder (ODD); they were scored together to form a variable called the Disruptive-Total (D-Total). The D-Total was the primary outcome measure for this study. The Hyperactive and Inattentive subscale scores were combined to form an ADHD-Total. To be eligible for the study, a child had to obtain a parent-rated NCBRF D-Total score of  $\geq 27$  (90<sup>th</sup> percentile). During the acute trial, a “clinical responder” was defined in part as having a parent-rated NCBRF D-Total score of  $\leq 15$  (within 0.5 of the normative mean). For the purposes of statistical evaluation at study endpoint, a clinical responder was defined in part as having a reduction to the NCBRF D-Total of  $\geq 25\%$ .

Clinicians completed the Overt Aggression Scale-Modified (OAS-M), a seven-item instrument from both parent and child report. Questions assess aggression on the dimensions of assaults against (a) objects, (b) others, and (c) self, on rating subscales ranging from 0 (no events) to 5 (severe events). Children receiving a score of at least 3, both at screen and at baseline, qualified for inclusion. Providing some notion of initial severity, a score of 3 for assaults against objects is anchored with “Breaks objects, smashes windows,” whereas a score of 3 for assaults against others is characterized as “Attacks others, causing mild injury (bruises, sprains, welts, etc.).”

In order to qualify, a child also required a Clinical Global Impressions–Severity (CGI-S) score of at least 4, moderately ill, reflecting the presence of consistent attention-deficit/hyperactivity disorder (ADHD), disruptive, and physically aggressive/destructive behavior. Anger, defiance, and aggressive speech were not enough to qualify children for the study. Participants had to display behavior that was physically harmful to others, themselves, or the environment around them. We established interrater reliability on the CGI-S by discussion at investigators meetings, subsequent “gold standard” test vignettes, and repeated re-certifications of blinded evaluators.

During the acute trial, a “clinical responder” was defined in part as having a blinded-evaluator-determined Clinical Global Impressions–Improvement (CGI-I) score of 1 (very much improved). We established interrater reliability on the CGI-I subscales by discussion at investigators meetings, subsequent

“gold standard” test vignettes, and repeated re-certifications of blinded evaluators. For the purposes of statistical evaluation at study endpoint, a clinical responder was defined in the more usual way, a CGI-I of 1 (very much improved) or 2 (much improved).

The Child and Adolescent Symptom Inventory–4R (CASI-4R) assesses a broad range of *DSM-IV*-defined disorders and was administered at initial diagnostic evaluation (parents only), baseline, and Week 9. Individual items are rated on a scale from 0 (never) to 3 (very often). The last item in each CASI-4R symptom scale assesses impairment: “How often do the behaviors in [this symptom category] interfere with youth’s ability to do schoolwork or get along with others?” For the ADHD subscale, there is one impairment item for all subtypes. Impairment severity is rated on a 4-point scale, and the impairment cutoff score (categorical) is a frequency rating of often or very often.

Parents completed the Antisocial Behavior Scale (ABS), a 28-item rating scale that has an Instrumental (Proactive) Aggression subscale (5 proactive items and 5 covert antisocial items) and a Reactive Aggression subscale (6 items). This instrument was used to differentiate affective and instrumental subtypes of aggression and to assess treatment effects on both.

Extrapyramidal symptoms were assessed with the Barnes Akathisia Scale and Abnormal Involuntary Movement Scale (AIMS). The Barnes Akathisia Scale is a clinician-completed scale utilizing both objective observation/clinical judgment and the patient’s subjective experience of restlessness. The Simpson-Angus Rating Scale checks for extrapyramidal side effects (rigidity, dystonia, and abnormal glabellar reflex) of antipsychotics, a standardized clinician-rated review of tremor, dyskinesia, and other possible antipsychotic neuromotor side effects.

Laboratory measures included weight, body mass index (BMI) percentiles, heart rate, blood pressure, and prolactin concentrations.

**Table S1:** Baseline Characteristics of Children Lost to Follow-Up Versus Week 52 Participants

| Characteristic                    | Lost to Follow-Up<br>(n=60) | Week 52 Participants<br>(n=108) |
|-----------------------------------|-----------------------------|---------------------------------|
| Gender, n (%)                     |                             |                                 |
| Male                              | 46 (76.7)                   | 83 (76.9)                       |
| Female                            | 14 (23.3)                   | 25 (23.1)                       |
| Disorder, n (%)                   |                             |                                 |
| Conduct disorder                  | 16 (26.7)                   | 28 (25.9)                       |
| Oppositional defiant disorder     | 44 (73.3)                   | 80 (74.1)                       |
| Age (y) at screening, m (SD)      | 9.0 (2.1)                   | 8.8 (2.0)                       |
| IQ at screening, m (SD)           | 93.8 (13.5)                 | 98.9 (14.2)                     |
| Race, n (%)                       |                             |                                 |
| White                             | 28 (46.7)                   | 61 (56.5)                       |
| Black                             | 26 (43.3)                   | 32 (29.6)                       |
| Asian                             | 0 (0.0)                     | 1 (0.9)                         |
| American Indian or Alaskan Native | 1 (1.7)                     | 1 (0.9)                         |
| Multiracial                       | 4 (6.8)                     | 13 (12.0)                       |
| Ethnicity, n (%)                  |                             |                                 |
| Hispanic origin                   | 4 (6.7)                     | 5 (4.6)                         |
| Non-Hispanic origin               | 55 (91.7)                   | 102 (94.4)                      |
| Unknown                           | 1 (1.7)                     | 1 (0.9)                         |
| Child's type of school, n (%)     |                             |                                 |
| Other                             | 10 (16.7)                   | 13 (12.0)                       |
| Regular public (or parochial)     | 50 (83.3)                   | 95 (88.0)                       |
| Mother's employment, n (%)        |                             |                                 |
| Keeping house                     | 4 (6.7)                     | 17 (15.7)                       |
| Other                             | 27 (45.0)                   | 32 (29.6)                       |
| Working full-/part-time           | 29 (48.3)                   | 59 (54.6)                       |
| Father's employment, n (%)        |                             |                                 |
| Keeping house                     | 1 (1.7)                     | 0 (0.0)                         |
| Other                             | 30 (50.0)                   | 45 (41.7)                       |
| Working full-/part-time           | 27 (45.0)                   | 62 (57.4)                       |
| Unknown                           | 2 (3.3)                     | 1 (0.9)                         |

|                                        |             |             |
|----------------------------------------|-------------|-------------|
| Mother's education, n (%)              |             |             |
| Some high school or less               | 10 (16.7)   | 6 (5.6)     |
| High school graduate or GED            | 14 (23.3)   | 26 (24.1)   |
| Some college or more                   | 36 (60.0)   | 75 (69.4)   |
| Not in household or unknown            | 0 (0.0)     | 1 (0.9)     |
| Father's education, n (%)              |             |             |
| Some high school or less               | 4 (6.7)     | 3 (2.8)     |
| High school graduate or GED            | 21 (35.0)   | 28 (25.9)   |
| Some college or more                   | 14 (23.3)   | 45 (41.7)   |
| Not in household or unknown            | 21 (35.0)   | 32 (29.6)   |
| Income, n (%)                          |             |             |
| Less than \$20,000                     | 25 (41.7)   | 36 (33.3)   |
| \$20,001-\$40,000                      | 15 (25.0)   | 20 (18.5)   |
| \$40,001-\$60,000                      | 10 (16.7)   | 14 (13.0)   |
| \$60,001-\$90,000                      | 5 (8.3)     | 16 (14.8)   |
| More than \$90,000                     | 4 (6.7)     | 17 (15.7)   |
| Unknown                                | 1 (1.7)     | 5 (4.6)     |
| NCBRF, D-Total, mean (SD)              | 44.4 (10.7) | 45.8 (10.9) |
| CGI-S, n (%)                           |             |             |
| 4                                      | 10 (16.7)   | 12 (11.1)   |
| 5                                      | 36 (60.0)   | 71 (65.7)   |
| 6                                      | 14 (23.3)   | 25 (23.1)   |
| OAS (parent-rated), <sup>a</sup> n (%) |             |             |
| Assault against objects                | 48 (80.0)   | 82 (75.9)   |
| Assault against others                 | 53 (88.3)   | 102 (94.4)  |
| Assault against self                   | 5 (8.3)     | 9 (8.3)     |

Note: No statistically significant differences between those that participated in the follow-up vs. those that did not except for IQ (two-sample *t*-test,  $p=.023$ ). CGI = Clinical Global Impressions; GED = general educational development; NCBRF = Nisonger Child Behavior Rating Form; OAS-M = Overt Aggression Scale-Modified.  
<sup>a</sup>Number and percent for those with scores of 3 or higher.

**Table S2:** Primary and Secondary Behavioral Outcomes Based on Randomized Treatment Status

| Outcome Measure        | Baseline        | Week 52     | <i>p</i> Values                    |                      |
|------------------------|-----------------|-------------|------------------------------------|----------------------|
|                        |                 |             | Trt*visit interaction <sup>a</sup> | Week 52 <sup>b</sup> |
| Basic, n               | 55              | 55          |                                    |                      |
| Augmented, n           | 53 <sup>e</sup> | 52          |                                    |                      |
| NCBRF Measures         |                 |             |                                    |                      |
| D-Total                |                 |             |                                    |                      |
| Basic                  | 44.6 (10.3)     | 24.9 (16.9) | 0.0811                             | 0.028 <sup>b</sup>   |
| Augmented              | 42.6 (10.7)     | 18.3 (12.3) |                                    |                      |
| Positive Social        |                 |             |                                    |                      |
| Basic                  | 8.3 (3.9)       | 15.3 (6.3)  | 0.9138                             | 0.1734               |
| Augmented              | 9.8 (3.4)       | 16.6 (5.8)  |                                    |                      |
| Overly Sensitive       |                 |             |                                    |                      |
| Basic                  | 6.5 (3.3)       | 4.1 (3.1)   | 0.4738                             | 0.1403               |
| Augmented              | 6.1 (3.2)       | 3.2 (2.8)   |                                    |                      |
| ADHD                   |                 |             |                                    |                      |
| Basic                  | 25.5 (6.1)      | 13.5 (8.3)  | 0.1707                             | 0.1956               |
| Augmented              | 25.7 (5.4)      | 11.6 (7.2)  |                                    |                      |
| Withdrawn-dysphoric    |                 |             |                                    |                      |
| Basic                  | 13.9 (8.6)      | 8.6 (8.3)   | 0.2130 <sup>c</sup>                | 0.1731 <sup>c</sup>  |
| Augmented              | 13.6 (8.3)      | 6.6 (6.8)   |                                    |                      |
| ABS Measures           |                 |             |                                    |                      |
| Proactive              |                 |             |                                    |                      |
| Basic                  | 20.3 (5.1)      | 16.7 (5.1)  | 0.0881                             | 0.0249               |
| Augmented              | 19.8 (4.6)      | 14.9 (3.9)  |                                    |                      |
| Reactive               |                 |             |                                    |                      |
| Basic                  | 16.1 (1.8)      | 13.0 (3.1)  | 0.9304                             | 0.1183               |
| Augmented              | 15.3 (2.6)      | 12.2 (2.8)  |                                    |                      |
| CASI – mean item score |                 |             |                                    |                      |
| ADHD                   |                 |             |                                    |                      |
| Basic                  | 2.39 (0.55)     | 1.33 (0.67) | 0.6468                             | 0.0923               |
| Augmented              | 2.27 (0.54)     | 1.15 (0.59) |                                    |                      |
| Attention              |                 |             |                                    |                      |

|                             |             |             |                     |                     |
|-----------------------------|-------------|-------------|---------------------|---------------------|
| Basic                       | 2.46 (0.60) | 1.45 (0.67) | 0.7965              | 0.0409              |
| Augmented                   | 2.25 (0.60) | 1.21 (0.71) |                     |                     |
| Hyperactivity-Impulsivity   |             |             |                     |                     |
| Basic                       | 2.31 (0.67) | 1.20 (0.76) | 0.5551              | 0.3109              |
| Augmented                   | 2.29 (0.68) | 1.09 (0.65) |                     |                     |
| Hyperactivity               |             |             |                     |                     |
| Basic                       | 2.33 (0.74) | 1.09 (0.87) | 0.4131              | 0.3501              |
| Augmented                   | 2.36 (0.68) | 0.98 (0.64) |                     |                     |
| Impulsivity                 |             |             |                     |                     |
| Basic                       | 2.29 (0.73) | 1.33 (0.78) | 0.8104              | 0.3615              |
| Augmented                   | 2.21 (0.84) | 1.22 (0.81) |                     |                     |
| ODD                         |             |             |                     |                     |
| Basic                       | 2.42 (0.52) | 1.44 (0.82) | 0.4255              | 0.0598              |
| Augmented                   | 2.29 (0.64) | 1.19 (0.66) |                     |                     |
| Anger Irritability Symptoms |             |             |                     |                     |
| Basic                       | 2.34 (0.60) | 1.42 (0.91) | 0.584               | 0.0981              |
| Augmented                   | 2.20 (0.75) | 1.18 (0.69) |                     |                     |
| Noncompliance               |             |             |                     |                     |
| Basic                       | 2.47 (0.57) | 1.45 (0.81) | 0.3508              | 0.06                |
| Augmented                   | 2.34 (0.63) | 1.20 (0.72) |                     |                     |
| Conduct Disorder            |             |             |                     |                     |
| Basic                       | 0.58 (0.42) | 0.27 (0.30) | 0.3013 <sup>c</sup> | 0.0382 <sup>c</sup> |
| Augmented                   | 0.50 (0.45) | 0.17 (0.22) |                     |                     |
| Peer Conflict Scale         |             |             |                     |                     |
| Basic                       | 1.59 (0.95) | 0.83 (0.81) | 0.1908 <sup>c</sup> | 0.1682 <sup>c</sup> |
| Augmented                   | 1.50 (0.86) | 0.58 (0.62) |                     |                     |
| Physical Aggression         |             |             |                     |                     |
| Basic                       | 1.66 (0.99) | 0.85 (0.85) | 0.2115 <sup>c</sup> | 0.1722 <sup>c</sup> |
| Augmented                   | 1.59 (0.93) | 0.61 (0.66) |                     |                     |
| Nonphysical Aggression      |             |             |                     |                     |
| Basic                       | 1.60 (1.07) | 0.92 (0.90) | 0.0523 <sup>c</sup> | 0.1404 <sup>c</sup> |
| Augmented                   | 1.56 (0.93) | 0.64 (0.72) |                     |                     |
| Object Aggression           |             |             |                     |                     |

|                               |             |             |                     |                     |
|-------------------------------|-------------|-------------|---------------------|---------------------|
| Basic                         | 1.45 (1.07) | 0.63 (0.84) | 0.5951 <sup>c</sup> | 0.1356 <sup>c</sup> |
| Augmented                     | 1.22 (0.96) | 0.40 (0.69) |                     |                     |
| Generalized Anxiety           |             |             |                     |                     |
| Basic                         | 1.17 (0.63) | 0.64 (0.54) | 0.5475 <sup>c</sup> | 0.6842 <sup>c</sup> |
| Augmented                     | 1.05 (0.64) | 0.60 (0.53) |                     |                     |
| Other Anxiety                 |             |             |                     |                     |
| Basic                         | 0.42 (0.43) | 0.29 (0.36) | 0.5828 <sup>c</sup> | 0.4920 <sup>c</sup> |
| Augmented                     | 0.43 (0.50) | 0.27 (0.37) |                     |                     |
| Social Phobia                 |             |             |                     |                     |
| Basic                         | 0.52 (0.76) | 0.40 (0.60) | 0.4166 <sup>c</sup> | 0.1820 <sup>c</sup> |
| Augmented                     | 0.27 (0.43) | 0.29 (0.56) |                     |                     |
| Separation Anxiety            |             |             |                     |                     |
| Basic                         | 0.54 (0.77) | 0.31 (0.52) | 0.6816 <sup>c</sup> | 0.1106 <sup>c</sup> |
| Augmented                     | 0.37 (0.50) | 0.20 (0.32) |                     |                     |
| Schizoid Personality Disorder |             |             |                     |                     |
| Basic                         | 0.48 (0.62) | 0.45 (0.59) | 0.4163 <sup>c</sup> | 0.7404 <sup>c</sup> |
| Augmented                     | 0.67 (0.82) | 0.46 (0.71) |                     |                     |
| Enuresis, Encopresis          |             |             |                     |                     |
| Basic                         | 0.29 (0.54) | 0.19 (0.38) | 0.2522 <sup>c</sup> | 0.3375 <sup>c</sup> |
| Augmented                     | 0.57 (0.83) | 0.32 (0.58) |                     |                     |
| Schizophrenia                 |             |             |                     |                     |
| Basic                         | 0.31 (0.41) | 0.16 (0.34) | 0.7481 <sup>c</sup> | 0.3451 <sup>c</sup> |
| Augmented                     | 0.25 (0.40) | 0.12 (0.27) |                     |                     |
| Depression                    |             |             |                     |                     |
| Basic                         | 0.36 (0.28) | 0.20 (0.22) | 0.6795 <sup>c</sup> | 0.2104 <sup>c</sup> |
| Augmented                     | 0.32 (0.32) | 0.20 (0.31) |                     |                     |
| Manic Symptoms                |             |             |                     |                     |
| Basic                         | 1.05 (0.79) | 0.48 (0.59) | 0.4577 <sup>c</sup> | 0.1239 <sup>c</sup> |
| Augmented                     | 0.79 (0.74) | 0.36 (0.44) |                     |                     |
| Autism Spectrum               |             |             |                     |                     |
| Basic                         | 0.73 (0.55) | 0.36 (0.42) | 0.9621 <sup>c</sup> | 0.4682 <sup>c</sup> |
| Augmented                     | 0.69 (0.54) | 0.30 (0.41) |                     |                     |
| Anorexia                      |             |             |                     |                     |

|                                   |             |             |                     |                     |
|-----------------------------------|-------------|-------------|---------------------|---------------------|
| Basic                             | 0.28 (0.40) | 0.16 (0.31) | 0.0160 <sup>c</sup> | 0.2955 <sup>c</sup> |
| Augmented                         | 0.17 (0.34) | 0.21 (0.31) |                     |                     |
| Bulimia Nervosa                   |             |             |                     |                     |
| Basic                             | 0.28 (0.47) | 0.14 (0.26) | 0.7424 <sup>c</sup> | 0.6344 <sup>c</sup> |
| Augmented                         | 0.27 (0.44) | 0.18 (0.35) |                     |                     |
| Anxiety Composite                 |             |             |                     |                     |
| Basic                             | 0.67 (0.42) | 0.42 (0.40) | 0.6580 <sup>c</sup> | 0.6270 <sup>c</sup> |
| Augmented                         | 0.60 (0.46) | 0.38 (0.39) |                     |                     |
| Schizophrenia Spectrum Disorder   |             |             |                     |                     |
| Basic                             | 0.37 (0.40) | 0.26 (0.36) | 0.7294 <sup>c</sup> | 0.3639 <sup>c</sup> |
| Augmented                         | 0.39 (0.48) | 0.24 (0.38) |                     |                     |
| CASI – I, % impaired <sup>d</sup> |             |             |                     |                     |
| ADHD                              |             |             |                     |                     |
| Basic                             | 51 (92.7%)  | 21 (38.2%)  | 0.4138              | 0.7571              |
| Augmented                         | 44 (86.3%)  | 19 (36.5%)  |                     |                     |
| ODD                               |             |             |                     |                     |
| Basic                             | 49 (89.1%)  | 18 (33.3%)  | 0.3852              | 0.8758              |
| Augmented                         | 41 (80.4%)  | 16 (31.4%)  |                     |                     |
| Conduct Disorder                  |             |             |                     |                     |
| Basic                             | 20 (36.4%)  | 7 (12.7%)   | 0.2079              | 0.0673              |
| Augmented                         | 14 (26.4%)  | 1 (1.9%)    |                     |                     |
| Peer Conflict Scale               |             |             |                     |                     |
| Basic                             | 20 (46.5%)  | 7 (15.9%)   | 0.1476              | 0.2198              |
| Augmented                         | 21 (55.3%)  | 3 (7.9%)    |                     |                     |
| Generalized Anxiety               |             |             |                     |                     |
| Basic                             | 23 (41.8%)  | 8 (14.5%)   | 0.4122              | 0.1543              |
| Augmented                         | 18 (34.0%)  | 3 (5.8%)    |                     |                     |
| Social Phobia                     |             |             |                     |                     |
| Basic                             | 8 (14.5%)   | 3 (5.5%)    | 0.078               | 0.7112              |
| Augmented                         | 2 (3.8%)    | 4 (7.8%)    |                     |                     |
| Separation Anxiety                |             |             |                     |                     |
| Basic                             | 9 (16.4%)   | 3 (5.5%)    | 0.3859              | 0.3549              |
| Augmented                         | 1 (1.9%)    | 1 (1.9%)    |                     |                     |



|                                  |            |            |        |                     |
|----------------------------------|------------|------------|--------|---------------------|
| Schizoid Personality Disorder    |            |            |        |                     |
| Basic                            | 5 (9.1%)   | 2 (3.6%)   | 0.6343 | 0.6533              |
| Augmented                        | 11 (21.2%) | 3 (5.8%)   |        |                     |
| Schizophrenia                    |            |            |        |                     |
| Basic                            | 3 (5.5%)   | 2 (3.6%)   | 0.8132 | 0.9391              |
| Augmented                        | 4 (7.5%)   | 2 (3.8%)   |        |                     |
| Depression                       |            |            |        |                     |
| Basic                            | 6 (10.9%)  | 2 (3.6%)   | 0.4975 | 0.4905              |
| Augmented                        | 6 (11.3%)  | 4 (7.7%)   |        |                     |
| Manic Symptoms                   |            |            |        |                     |
| Basic                            | 18 (32.7%) | 4 (7.3%)   | 0.5754 | 0.9978              |
| Augmented                        | 13 (24.5%) | 4 (7.7%)   |        |                     |
| Autism Spectrum                  |            |            |        |                     |
| Basic                            | 14 (25.5%) | 4 (7.3%)   | 0.9845 | 0.9267              |
| Augmented                        | 15 (28.3%) | 4 (7.7%)   |        |                     |
| Anorexia                         |            |            |        |                     |
| Basic                            | 1 (1.8%)   | 1 (1.8%)   | 0.9964 | 0.8443              |
| Augmented                        | 2 (3.8%)   | 2 (3.8%)   |        |                     |
| Bulimia Nervosa                  |            |            |        |                     |
| Basic                            | 2 (3.6%)   | 0 (0.0%)   | 0.9964 | 0.9955              |
| Augmented                        | 1 (1.9%)   | 0 (0.0%)   |        |                     |
| CGI-I, % much/very much improved |            |            |        |                     |
| Basic                            | 1 (1.8%)   | 33 (60%)   | 0.7163 | 0.1445              |
| Augmented                        | 1 (1.9%)   | 38 (73.1%) |        |                     |
| CGI-S, % non-clinical            |            |            |        |                     |
| Basic                            | 0 (0%)     | 23 (41.8%) | n/a    | 0.0200 <sup>f</sup> |
| Augmented                        | 0 (0%)     | 34 (65.4%) |        |                     |

Note: ABS = Antisocial Behavior Scale; ADHD = attention-deficit/hyperactivity disorder; CASI = Child and Adolescent Symptom Inventory; CD = conduct disorder; CGI = Clinical Global Impressions; I = impairment; NCBRF = Nisonger Child Behavior Rating Form; ODD = oppositional defiant disorder; S = severity.

<sup>a</sup> A significant Trt\*Visit interaction signifies that the change from baseline to Week 52 significantly differed for the Basic and Augmented treatment strategies.

<sup>b</sup> Difference between groups at Week 52, determined by mixed model simple main effects test.

<sup>c</sup> Square root transformation.

<sup>d</sup> Impairment defined as often or very often.

<sup>e</sup> At baseline, Augmented  $n=51$  for ADHD and ODD scales.

<sup>f</sup> Fisher's exact test, Week 52 data.

**Table S3:** Behavioral Outcomes for Children Receiving Consistent Treatment From Acute Trial to Follow-Up

| Outcome Measure                 | Baseline<br>Mean (SD) | Week 52<br>Mean (SD) | <i>p</i> Values                       |                      |
|---------------------------------|-----------------------|----------------------|---------------------------------------|----------------------|
|                                 |                       |                      | Trt*visit<br>interaction <sup>a</sup> | Week 52 <sup>b</sup> |
| NCBRF Measures                  |                       |                      |                                       |                      |
| D-Total                         |                       |                      |                                       |                      |
| Basic                           | 44.2 (11.2)           | 23.3 (16.5)          | 0.2896                                | 0.0582               |
| Augmented                       | 40.6 (9.9)            | 15.3 (9.9)           |                                       |                      |
| Positive Social                 |                       |                      |                                       |                      |
| Basic                           | 8.7 (4.3)             | 15.0 (6.1)           | 0.0777                                | 0.0047               |
| Augmented                       | 10.4 (3.2)            | 19.7 (4.4)           |                                       |                      |
| Overly Sensitive                |                       |                      |                                       |                      |
| Basic                           | 6.2 (3.6)             | 4.7 (2.9)            | 0.2223                                | 0.0964               |
| Augmented                       | 6.2 (3.2)             | 3.3 (2.5)            |                                       |                      |
| ADHD                            |                       |                      |                                       |                      |
| Basic                           | 24.5 (6.2)            | 12.5 (8.6)           | 0.0182                                | 0.1571               |
| Augmented                       | 26.5 (5.1)            | 9.2 (6.5)            |                                       |                      |
| Withdrawn-dysphoric             |                       |                      |                                       |                      |
| Basic                           | 12.1 (8.8)            | 8.9 (8.5)            | 0.1937 <sup>c</sup>                   | 0.3229 <sup>c</sup>  |
| Augmented                       | 13.1 (8.2)            | 5.5 (4.6)            |                                       |                      |
| ABS Measures                    |                       |                      |                                       |                      |
| Proactive                       |                       |                      |                                       |                      |
| Basic                           | 21.2 (4.5)            | 17.1 (4.6)           | 0.3400                                | 0.0156               |
| Augmented                       | 19.2 (4.5)            | 14.0 (3.5)           |                                       |                      |
| Reactive                        |                       |                      |                                       |                      |
| Basic                           | 16.0 (1.8)            | 13.0 (3.5)           | 0.2824                                | 0.1597               |
| Augmented                       | 15.8 (2.4)            | 11.7 (2.4)           |                                       |                      |
| CASI – Mean Item Score Measures |                       |                      |                                       |                      |
| ADHD                            |                       |                      |                                       |                      |
| Basic                           | 2.38 (0.51)           | 1.26 (0.71)          | 0.1614                                | 0.1022               |
| Augmented                       | 2.35 (0.50)           | 0.94 (0.55)          |                                       |                      |
| ODD                             |                       |                      |                                       |                      |

|                               |             |             |                     |                     |
|-------------------------------|-------------|-------------|---------------------|---------------------|
| Basic                         | 2.53 (0.51) | 1.36 (0.78) | 0.7410              | 0.0558              |
| Augmented                     | 2.22 (0.65) | 0.98 (0.49) |                     |                     |
| Conduct Disorder              |             |             |                     |                     |
| Basic                         | 0.54 (0.43) | 0.25 (0.31) | 0.0685 <sup>c</sup> | 0.0238 <sup>c</sup> |
| Augmented                     | 0.45 (0.38) | 0.10 (0.13) |                     |                     |
| Peer Conflict Scale           |             |             |                     |                     |
| Basic                         | 1.60 (0.85) | 0.83 (0.76) | 0.2431 <sup>c</sup> | 0.0610 <sup>c</sup> |
| Augmented                     | 1.29 (0.86) | 0.42 (0.43) |                     |                     |
| Generalized Anxiety           |             |             |                     |                     |
| Basic                         | 1.06 (0.61) | 0.58 (0.55) | 0.3612 <sup>c</sup> | 0.6692 <sup>c</sup> |
| Augmented                     | 1.15 (0.59) | 0.46 (0.35) |                     |                     |
| Other Anxiety                 |             |             |                     |                     |
| Basic                         | 0.42 (0.43) | 0.28 (0.35) | 0.0414 <sup>c</sup> | 0.0749 <sup>c</sup> |
| Augmented                     | 0.41 (0.40) | 0.16 (0.26) |                     |                     |
| Social Phobia                 |             |             |                     |                     |
| Basic                         | 0.35 (0.71) | 0.35 (0.63) | 0.1449 <sup>c</sup> | 0.0944 <sup>c</sup> |
| Augmented                     | 0.23 (0.32) | 0.07 (0.17) |                     |                     |
| Separation Anxiety            |             |             |                     |                     |
| Basic                         | 0.36 (0.66) | 0.21 (0.47) | 0.7210 <sup>c</sup> | 0.9982 <sup>c</sup> |
| Augmented                     | 0.33 (0.45) | 0.17 (0.27) |                     |                     |
| Schizoid Personality Disorder |             |             |                     |                     |
| Basic                         | 0.43 (0.63) | 0.32 (0.44) | 0.3680 <sup>c</sup> | 0.9701 <sup>c</sup> |
| Augmented                     | 0.61 (0.73) | 0.25 (0.27) |                     |                     |
| Enuresis, Encopresis          |             |             |                     |                     |
| Basic                         | 0.40 (0.66) | 0.28 (0.44) | 0.7031 <sup>c</sup> | 0.1893 <sup>c</sup> |
| Augmented                     | 0.28 (0.54) | 0.15 (0.44) |                     |                     |
| Schizophrenia                 |             |             |                     |                     |
| Basic                         | 0.27 (0.35) | 0.13 (0.24) | 0.2436 <sup>c</sup> | 0.0344 <sup>c</sup> |
| Augmented                     | 0.17 (0.20) | 0.04 (0.10) |                     |                     |
| Depression                    |             |             |                     |                     |
| Basic                         | 0.34 (0.31) | 0.23 (0.28) | 0.0892 <sup>c</sup> | 0.0389 <sup>c</sup> |

|                                          |             |             |                     |                     |
|------------------------------------------|-------------|-------------|---------------------|---------------------|
| Augmented                                | 0.25 (0.22) | 0.09 (0.14) |                     |                     |
| Manic Symptoms                           |             |             |                     |                     |
| Basic                                    | 0.71 (0.63) | 0.33 (0.40) | 0.2586 <sup>c</sup> | 0.0950 <sup>c</sup> |
| Augmented                                | 0.71 (0.78) | 0.15 (0.24) |                     |                     |
| Autism Spectrum                          |             |             |                     |                     |
| Basic                                    | 0.65 (0.47) | 0.38 (0.41) | 0.2266 <sup>c</sup> | 0.1798 <sup>c</sup> |
| Augmented                                | 0.66 (0.44) | 0.18 (0.21) |                     |                     |
| Anorexia                                 |             |             |                     |                     |
| Basic                                    | 0.19 (0.33) | 0.21 (0.38) | 0.8071 <sup>c</sup> | 0.7516 <sup>c</sup> |
| Augmented                                | 0.21 (0.37) | 0.15 (0.24) |                     |                     |
| Bulimia Nervosa                          |             |             |                     |                     |
| Basic                                    | 0.20 (0.46) | 0.15 (0.29) | 0.7011 <sup>c</sup> | 0.6768 <sup>c</sup> |
| Augmented                                | 0.24 (0.38) | 0.20 (0.35) |                     |                     |
| Anxiety Composite                        |             |             |                     |                     |
| Basic                                    | 0.61 (0.43) | 0.39 (0.42) | 0.1080 <sup>c</sup> | 0.2580 <sup>c</sup> |
| Augmented                                | 0.62 (0.34) | 0.24 (0.24) |                     |                     |
| Schizophrenia Spectrum Disorder          |             |             |                     |                     |
| Basic                                    | 0.32 (0.41) | 0.19 (0.23) | 0.1991 <sup>c</sup> | 0.3033 <sup>c</sup> |
| Augmented                                | 0.32 (0.28) | 0.11 (0.14) |                     |                     |
| CASI–Impairment, % impaired <sup>d</sup> |             |             |                     |                     |
| ADHD                                     |             |             |                     |                     |
| Basic                                    | 19 (95.0%)  | 5 (25.0%)   | 0.6638              | 0.9456              |
| Augmented                                | 21 (91.3%)  | 6 (26.1%)   |                     |                     |
| ODD                                      |             |             |                     |                     |
| Basic                                    | 18 (90.0%)  | 4 (21.1%)   | 0.4062              | 0.9198              |
| Augmented                                | 18 (78.3%)  | 5 (22.7%)   |                     |                     |
| Conduct Disorder                         |             |             |                     |                     |
| Basic                                    | 5 (25.0%)   | 3 (15.0%)   | 0.5943              | 0.5774              |
| Augmented                                | 5 (21.7%)   | 0 (0.0%)    |                     |                     |
| Peer Conflict Scale                      |             |             |                     |                     |
| Basic                                    | 10 (62.5%)  | 4 (23.5%)   | 0.9968              | 0.9965              |

|                               |           |           |        |        |
|-------------------------------|-----------|-----------|--------|--------|
| Augmented                     | 7 (43.8%) | 0 (0.0%)  |        |        |
| Generalized Anxiety           |           |           |        |        |
| Basic                         | 5 (25.0%) | 3 (15.0%) | 0.9884 | 0.9887 |
| Augmented                     | 7 (30.4%) | 0 (0.0%)  |        |        |
| Social Phobia                 |           |           |        |        |
| Basic                         | 3 (15.0%) | 1 (5.0%)  | 0.7716 | 0.6827 |
| Augmented                     | 1 (4.3%)  | 0 (0.0%)  |        |        |
| Separation Anxiety            |           |           |        |        |
| Basic                         | 2 (10.0%) | 1 (5.0%)  | 0.9935 | 0.9923 |
| Augmented                     | 1 (4.3%)  | 0 (0.0%)  |        |        |
| Schizoid Personality Disorder |           |           |        |        |
| Basic                         | 2 (10.0%) | 0 (0.0%)  | N/A    | N/A    |
| Augmented                     | 4 (17.4%) | 0 (0.0%)  |        |        |
| Schizophrenia                 |           |           |        |        |
| Basic                         | 0 (0.0%)  | 0 (0.0%)  | N/A    | N/A    |
| Augmented                     | 0 (0.0%)  | 0 (0.0%)  |        |        |
| Depression                    |           |           |        |        |
| Basic                         | 2 (10.0%) | 1 (5.0%)  | 0.4108 | 0.6417 |
| Augmented                     | 1 (4.3%)  | 2 (8.7%)  |        |        |
| Manic Symptoms                |           |           |        |        |
| Basic                         | 5 (25.0%) | 0 (0.0%)  | 0.9952 | 0.9953 |
| Augmented                     | 5 (21.7%) | 1 (4.3%)  |        |        |
| Autism Spectrum               |           |           |        |        |
| Basic                         | 6 (30.0%) | 2 (10.0%) | 0.9966 | 0.9966 |
| Augmented                     | 6 (26.1%) | 0 (0.0%)  |        |        |
| Anorexia                      |           |           |        |        |
| Basic                         | 0 (0.0%)  | 1 (5.0%)  | 0.9968 | 0.9579 |
| Augmented                     | 1 (4.3%)  | 0 (0.0%)  |        |        |
| Bulimia Nervosa               |           |           |        |        |
| Basic                         | 0 (0.0%)  | 0 (0.0%)  | 0.9997 | 0.9998 |
| Augmented                     | 0 (0.0%)  | 0 (0.0%)  |        |        |

|                                  |          |            |        |                     |
|----------------------------------|----------|------------|--------|---------------------|
| CGI-I, % much/very much improved |          |            |        |                     |
| Basic                            | 0 (0.0%) | 13 (65.0%) | 0.9605 | 0.0932              |
| Augmented                        | 1 (4.4%) | 20 (87.0%) |        |                     |
| CGI-S, % non-clinical            |          |            |        |                     |
| Basic                            | 0 (0.0%) | 11 (55.0%) | n/a    | 0.0943 <sup>e</sup> |
| Augmented                        | 0 (0.0%) | 19 (82.6%) |        |                     |

Note: ABS = Antisocial Behavior Scale; ADHD = attention-deficit/hyperactivity disorder; CASI = Child and Adolescent Symptom Inventory; CD = conduct disorder; CGI = Clinical Global Impressions; I = impairment; NCBRF = Nisonger Child Behavior Rating Form; ODD = oppositional defiant disorder; S = severity.

<sup>a</sup> A significant Trt\*Visit interaction signifies that the change from baseline to Week 52 significantly differed for the Basic and Augmented treatment strategies.

<sup>b</sup> Difference between groups at Week 52, determined by mixed model simple main effects test.

<sup>c</sup> Square root transformation.

<sup>d</sup> Impairment defined as often or very often. Basic (baseline [BL] and Week 52)  $n = 20$ ; augmented (BL and Week 52)  $n = 23$ .

<sup>e</sup> Fisher's exact test, Week 52 data.

## SUPPLEMENT 2

### Outcome Analyses for Groups Defined According to Number of Medications at Week 52

*Statistical analyses.* Groups receiving None ( $n = 18$ ), Single ( $n = 32$ ), and Multiple ( $n = 58$ ) medications were compared using analysis of variance (ANOVA) or Kruskal-Wallis depending on distribution of the data, for quantitative outcomes, or Fisher's exact test for categorical outcomes. For outcomes where significant omnibus tests were found, pairwise comparisons were explored with  $p$  values adjusted by the Bonferroni method. For the significant findings at Week 52, none of the baselines differed between groups. For Week 52 medication assessments, the group not receiving any medications (None) had higher mean item CASI-4R Schizophrenia Spectrum Disorder and Anger Irritability Symptom scores at baseline than single and multiple medication groups; however, when controlling for the baseline value, none of the group assignment effects changed.

*Behavioral outcomes.* No group differences were found for any of the behavioral outcome measures.

*Safety outcomes.* There was a significant main effect of weight ( $p = .0477$ ), and there was a significant difference ( $p = .0138$ ) between none vs. single regimens, with the former at higher weight (Table S4). For prolactin (quantitative value), there was a significant difference between single vs. multiple ( $p = .0003$ ), with the multiple group having higher prolactin levels (Table S4). For the prolactin threshold ( $>18\text{ng/mL}$  for boys,  $>30\text{ng/mL}$  for girls), a higher proportion of those in the multiple group had elevated prolactin levels, compared to none or single.

**Table S4:** Week 52 Weight and Prolactin Comparisons Between None, Single, and Multiple Medication Regimens

| Outcome Measure                           | None         | Single       | Multiple      | <i>p</i> Value <sup>a</sup> |
|-------------------------------------------|--------------|--------------|---------------|-----------------------------|
| Weight                                    | <i>n</i> =18 | <i>n</i> =31 | <i>n</i> =58  |                             |
| Weight-for-age <i>z</i> -score, mean (SD) | 0.94 (1.50)  | 0.09 (1.05)  | 0.44 (1.01)   | .0477                       |
| Height                                    |              |              |               |                             |
| Height-for-age <i>z</i> -score, mean (SD) | 0.60 (1.41)  | 0.30 (0.98)  | 0.04 (0.85)   | .1302                       |
| Prolactin                                 | <i>n</i> =15 | <i>n</i> =29 | <i>n</i> =53  |                             |
| Prolactin (ng/mL), mean (SD)              | 8.29 (4.49)  | 6.61 (4.54)  | 19.01 (14.73) | .0002                       |
| Prolactin elevated threshold (1)          |              |              |               |                             |
| No                                        | 15 (100.0%)  | 28 (96.6%)   | 30 (56.6%)    | <.0001                      |
| Yes                                       | 0 (0.0%)     | 1 (3.4%)     | 23 (43.4%)    |                             |
| Prolactin elevated threshold (2)          |              |              |               |                             |
| No                                        | 15 (100.0%)  | 29 (100.0%)  | 52 (98.1%)    | 1.0000                      |
| Yes                                       | 0 (0.0%)     | 0 (0.0%)     | 1 (1.9%)      |                             |

Note: Threshold definitions: (1) boys, > 18ng/mL; girls, > 30ng/mL and (2) Prolactin > 50ng/mL (boys or girls).

<sup>a</sup>Omnibus test for group comparisons



## SUPPLEMENT 3

### Outcome Analyses for Groups Defined According to Basic or Augmented Status at Week 52

*Statistical analyses.* Two strategies were used to parse participants: one strategy was based on drug class consistent with original definition of Basic (stimulant,  $n = 28$ ) and Augmented (stimulant, atypical neuroleptic;  $n = 35$ ). This excluded all children receiving other concomitant medications. The second was based on the reason (indication) for which medication was prescribed and included concomitant medications as long as they were not prescribed for ADHD/aggression: Augmented Indications ( $n = 40$ ) vs. Basic Indications ( $n = 32$ ). For these analyses, groups were compared via two-sample  $t$ -test or Mann-Whitney U test, depending on distribution of the data, for quantitative outcomes or Fisher's exact test for categorical outcomes. For the significant findings at Week 52, none of the baselines differed between groups. For Week 52 Indications strategy, Augmented Indications had a higher mean item CASI-4R Schizophrenia Spectrum Disorder score at baseline than Basic Indications, however when controlling for the baseline value, none of the treatment effects changed.

*Behavioral outcomes.* The Augmented Indications group had higher scores on the Positive Social NCBRF scale (Table S5A). The Original Augmented group had lower scores on the ABS Instrumental (Proactive) Aggression scale. The Basic group (Original and Indications) had higher mean item scores on the Schizophrenia subscale of the CASI-4R. For the Indications strategy, CASI-4R Schizophrenia Spectrum Disorder mean item scores differed (with Augmented Indications having a higher score at baseline than Basic Indications), however when controlling for the baseline value, none of the treatment effects changed.

**Table S5A:** Analyses for Week 52 Differences Between Groups Defined in Terms of Original Drug Class (Original Basic, Original Augmented) and Indications (Basic Indications, Augmented Indications) at Week 52

| Outcome Measure                   | Original Drug Class <sup>a</sup> |                            |                | Indications <sup>b</sup> |                            |                |
|-----------------------------------|----------------------------------|----------------------------|----------------|--------------------------|----------------------------|----------------|
|                                   | <i>Basic</i><br>n = 28           | <i>Augmented</i><br>n = 35 | <i>p</i> Value | <i>Basic</i><br>n = 32   | <i>Augmented</i><br>n = 40 | <i>p</i> Value |
| NCBRF, mean (SD)                  |                                  |                            |                |                          |                            |                |
| D-Total                           | 22.2 (16.1)                      | 16.6 (12.1)                | .1193          | 23.4 (16.0)              | 17.7 (12.1)                | .0872          |
| Positive social                   | 15.5 (5.8)                       | 19.5 (5.2)                 | .0054          | 15.4 (5.6)               | 18.4 (5.8)                 | .0328          |
| Overly sensitive                  | 4.0 (2.8)                        | 3.1 (2.6)                  | .1832          | 3.9 (2.7)                | 3.1 (2.6)                  | .1843          |
| ADHD                              | 12.1 (7.6)                       | 9.2 (6.1)                  | .1043          | 12.3 (7.2)               | 9.7 (6.0)                  | .0930          |
| Withdrawn-dysphoric               | 8.6 (8.3)                        | 4.9 (4.3)                  | .1319          | 8.8 (8.1)                | 5.3 (4.4)                  | .1166          |
| ABS, mean (SD)                    |                                  |                            |                |                          |                            |                |
| Proactive                         | 16.2 (4.7)                       | 14.0 (3.8)                 | .0430          | 16.3 (4.7)               | 14.6 (4.0)                 | 0.0918         |
| Reactive                          | 12.5 (3.4)                       | 11.5 (2.4)                 | .1813          | 12.7 (3.2)               | 11.9 (2.6)                 | 0.2240         |
| CASI – mean item score, mean (SD) |                                  |                            |                |                          |                            |                |
| ADHD                              | 1.20 (0.66)                      | 0.97 (0.52)                | .1706          | 1.25 (0.64)              | 1.01 (0.52)                | 0.1061         |
| Attention                         | 1.31 (0.73)                      | 1.02 (0.52)                | .1758          | 1.37 (0.74)              | 1.04 (0.52)                | 0.0913         |
| Hyperactivity-impulsivity         | 1.10 (0.69)                      | 0.91 (0.65)                | .2412          | 1.14 (0.70)              | 0.97 (0.64)                | 0.3484         |
| Hyperactivity                     | 0.98 (0.77)                      | 0.80 (0.70)                | .3027          | 1.01 (0.79)              | 0.87 (0.70)                | 0.4757         |
| Impulsivity                       | 1.24 (0.72)                      | 1.05 (0.72)                | .2697          | 1.30 (0.73)              | 1.10 (0.70)                | 0.2825         |
| ODD                               | 1.28 (0.74)                      | 1.01 (0.61)                | .1612          | 1.36 (0.76)              | 1.08 (0.61)                | 0.1236         |
| Anger irritability symp.          | 1.24 (0.86)                      | 0.93 (0.64)                | .1827          | 1.30 (0.85)              | 0.99 (0.64)                | 0.1317         |
| Noncompliance                     | 1.30 (0.73)                      | 1.06 (0.64)                | .1690          | 1.39 (0.76)              | 1.13 (0.65)                | 0.1331         |
| Conduct disorder                  | 0.23 (0.27)                      | 0.14 (0.19)                | .0910          | 0.24 (0.31)              | 0.16 (0.20)                | 0.1997         |
| Peer conflict scale               | 0.77 (0.74)                      | 0.49 (0.63)                | .1074          | 0.74 (0.74)              | 0.57 (0.65)                | 0.3824         |
| Physical aggression               | 0.82 (0.79)                      | 0.51 (0.70)                | .0690          | 0.78 (0.78)              | 0.62 (0.74)                | 0.3116         |
| Nonphysical aggression            | 0.88 (0.87)                      | 0.56 (0.68)                | .1350          | 0.86 (0.87)              | 0.63 (0.70)                | 0.2486         |
| Object aggression                 | 0.45 (0.74)                      | 0.30 (0.58)                | .5037          | 0.44 (0.73)              | 0.38 (0.62)                | 0.9587         |
| Generalized anxiety               | 0.55 (0.52)                      | 0.48 (0.37)                | .8340          | 0.55 (0.49)              | 0.52 (0.41)                | 0.9863         |
| Other anxiety                     | 0.24 (0.31)                      | 0.15 (0.24)                | .1068          | 0.26 (0.31)              | 0.19 (0.24)                | 0.2675         |
| Social phobia                     | 0.32 (0.55)                      | 0.13 (0.26)                | .2256          | 0.31 (0.54)              | 0.19 (0.31)                | 0.5694         |
| Separation anxiety                | 0.18 (0.41)                      | 0.16 (0.24)                | .6743          | 0.18 (0.40)              | 0.19 (0.26)                | 0.4423         |
| Schizoid personality disord.      | 0.37 (0.65)                      | 0.30 (0.44)                | .7288          | 0.42 (0.69)              | 0.35 (0.46)                | 0.6342         |

|                                          |             |             |        |             |             |        |
|------------------------------------------|-------------|-------------|--------|-------------|-------------|--------|
| Enuresis, encopresis                     | 0.23 (0.40) | 0.11 (0.37) | .0599  | 0.23 (0.40) | 0.14 (0.36) | 0.1765 |
| Schizophrenia                            | 0.14 (0.23) | 0.06 (0.16) | .0230  | 0.14 (0.21) | 0.07 (0.16) | 0.0191 |
| Depression                               | 0.23 (0.27) | 0.11 (0.14) | .0765  | 0.22 (0.26) | 0.12 (0.14) | 0.1538 |
| Manic symptoms                           | 0.33 (0.39) | 0.20 (0.27) | .1601  | 0.33 (0.37) | 0.24 (0.32) | 0.2212 |
| Autism spectrum                          | 0.35 (0.42) | 0.19 (0.23) | .3564  | 0.35 (0.40) | 0.22 (0.24) | 0.3774 |
| Anorexia                                 | 0.26 (0.37) | 0.14 (0.25) | .1302  | 0.25 (0.35) | 0.18 (0.33) | 0.2464 |
| Bulimia nervosa                          | 0.13 (0.26) | 0.16 (0.29) | .6865  | 0.12 (0.25) | 0.14 (0.28) | 0.5518 |
| Anxiety composite                        | 0.35 (0.37) | 0.25 (0.22) | .3172  | 0.36 (0.36) | 0.30 (0.25) | 0.5021 |
| Schizophrenia spectrum disorder          | 0.22 (0.29) | 0.14 (0.22) | .3702  | 0.23 (0.30) | 0.16 (0.22) | 0.5253 |
| CASI-Impairment, % impaired <sup>c</sup> |             |             |        |             |             |        |
| ADHD                                     | 8 (28.6%)   | 11 (31.4%)  | 1.0000 | 11 (34.4%)  | 14 (35.0%)  | 1.0000 |
| ODD                                      | 7 (25.9%)   | 9 (26.5%)   | 1.0000 | 10 (32.3%)  | 12 (30.8%)  | 1.0000 |
| Conduct disorder                         | 3 (10.7%)   | 0 (0.0%)    | .0825  | 4 (12.5%)   | 0 (0.0%)    | 0.0350 |
| Peer Conflict Scale                      | 5 (21.7%)   | 0 (0.0%)    | .0143  | 6 (22.2%)   | 1 (3.1%)    | 0.0402 |
| Generalized anxiety                      | 3 (10.7%)   | 2 (5.7%)    | .6480  | 3 (9.4%)    | 2 (5.0%)    | 0.6498 |
| Social phobia                            | 1 (3.7%)    | 0 (0.0%)    | .4355  | 1 (3.2%)    | 0 (0.0%)    | 0.4366 |
| Separation anxiety                       | 1 (3.6%)    | 0 (0.0%)    | .4444  | 1 (3.1%)    | 0 (0.0%)    | 0.4444 |
| Schizoid personality disorder.           | 1 (3.6%)    | 1 (2.9%)    | 1.0000 | 2 (6.3%)    | 1 (2.5%)    | 0.5815 |
| Schizophrenia                            | 0 (0.0%)    | 1 (2.9%)    | 1.0000 | 0 (0.0%)    | 1 (2.5%)    | 1.0000 |
| Depression                               | 1 (3.6%)    | 3 (8.6%)    | .6224  | 1 (3.1%)    | 3 (7.5%)    | 0.6239 |
| Manic symptoms                           | 1 (3.6%)    | 3 (8.6%)    | .6224  | 1 (3.1%)    | 4 (10.0%)   | 0.3732 |
| Autism spectrum                          | 3 (10.7%)   | 0 (0.0%)    | .0825  | 3 (9.4%)    | 1 (2.5%)    | 0.3166 |
| Anorexia                                 | 2 (7.1%)    | 0 (0.0%)    | .1935  | 2 (6.3%)    | 1 (2.5%)    | 0.5815 |
| Bulimia nervosa                          | 0 (0.0%)    | 0 (0.0%)    | N/A    | 0 (0.0%)    | 0 (0.0%)    | N/A    |
| CGI-I, % much/very much improved         | 18 (64.3%)  | 28 (80.0%)  | .2531  | 20 (62.5%)  | 33 (82.5%)  | 0.0655 |
| CGI-S, % nonclinical                     | 15 (53.6%)  | 25 (71.4%)  | .1903  | 16 (50.0%)  | 27 (67.5%)  | 0.1533 |

Note: Comparisons at Week 52 for treatment groups were analyzed via two-sample *t*-test or Mann-Whitney *U* test, depending on distribution of the data, for quantitative outcomes or Fisher's exact test for categorical outcomes. ABS = Antisocial Behavior Scale; ADHD = attention-deficit/hyperactivity disorder; CASI = Child and Adolescent Symptom Inventory; CD = conduct disorder; CGI = Clinical Global Impressions; I = impairment; NCBRF = Nisonger Child Behavior Rating Form; ODD = oppositional defiant disorder; S = severity.

<sup>a</sup> Treatment group status at Week 52 defined in terms of the type of medication (i.e., drug class) that met our original criteria for Basic (stimulant) and Augmented (stimulant, atypical antipsychotic) but excludes children who were receiving any other types of concomitant psychotropic medication prescribed for problems other than ADHD or aggression.

<sup>b</sup> Treatment group status at Week 52 defined in terms of the type of medication (i.e., drug class) that met our original criteria for Basic (stimulant) and Augmented (stimulant, atypical antipsychotic) and includes children who were receiving concomitant psychotropic medication prescribed for problems (indications) other than ADHD or aggression.

<sup>c</sup> Impairment defined as often or very often.

A larger proportion of those in the Basic Indications group were impaired for conduct disorder (CASI-4R) than the Augmented Indications group. A larger proportion of those in the Basic group (Original and Indications) were impaired for the Peer Conflict Scale than those in the Augmented group. Of note is the finding that when CASI-4R Impairment cutoff is defined as sometimes, often, or very often, the conduct disorder impairment comparison was no longer significant (Basic Indications 38% impaired vs. 25% for Augmented Indications,  $p = .31$ ). Similarly, the statistical significance for the Peer Conflict Scale was also diminished: Original Basic = 52% vs. 43% Original Augmented = 43%,  $p = .78$ , and Basic Indications = 52% vs. Augmented Indications = 50%,  $p = 1.00$ , respectively.

*Safety outcomes.* Group comparisons at Week 52 were analyzed via two-sample  $t$ -test or Mann-Whitney U test, depending on distribution of the data. Those in the Augmented group (Original and Indications) had higher weight-for-age  $z$ -scores (Table S5B).

**Table S5B:** Week 52 Vital Outcome Measure (Mean, Standard Deviation [SD]) Comparisons Between Basic Versus Augmented Groups

| Outcome Measure          | Original Drug Class <sup>a</sup> |                          |                | Indications <sup>b</sup> |                          |                |
|--------------------------|----------------------------------|--------------------------|----------------|--------------------------|--------------------------|----------------|
|                          | <i>Basic</i><br>n=28             | <i>Augmented</i><br>n=35 | <i>p</i> Value | <i>Basic</i><br>n=32     | <i>Augmented</i><br>n=40 | <i>p</i> Value |
| Weight-for-age z-score   | 0.16 (1.05)                      | 0.57 (0.99)              | .0648          | 0.05 (1.02)              | 0.53 (0.95)              | .0199          |
| Heart rate               | 83.5 (24.7)                      | 86.7 (14.0)              | .5502          | 82.8 (23.4)              | 85.9 (13.8)              | .5117          |
| Systolic blood pressure  | 102.5 (26.8)                     | 108.3 (9.7)              | .2799          | 102.8 (25.5)             | 107.6 (10.0)             | .3186          |
| Diastolic blood pressure | 64.6 (19.1)                      | 66.5 (8.7)               | .6288          | 65.1 (18.0)              | 66.5 (8.5)               | .6846          |
| Height-for-age z-score   | 0.39 (0.96)                      | 0.22 (0.79)              | .5753          | 0.30 (0.93)              | 0.17 (0.82)              | .6544          |

Note:

<sup>a</sup> Treatment group status at Week 52 defined in terms of the type of medication (i.e., drug class) that met our initial criteria for Basic (stimulant) and Augmented (stimulant, atypical antipsychotic) but excludes children who were receiving any other types of concomitant psychotropic medication prescribed for problems other than attention-deficit/hyperactivity disorder (ADHD) or aggression.

<sup>b</sup> Treatment group status at Week 52 defined in terms of the type of medication (i.e., drug class) that met our original criteria for Basic (stimulant) and Augmented (stimulant, atypical antipsychotic) and includes children who were receiving concomitant psychotropic medication prescribed for problems (indications) other than ADHD or aggression.

*Prolactin.* Comparisons at Week 52 for treatment groups (Original and Indications) were analyzed via Mann-Whitney U tests for quantitative outcomes or Fisher's exact test for categorical outcomes. Those in the Augmented group (Original and Indications) had higher prolactin levels (> 50ng/mL for boys or girls) (Table S5C). A higher proportion of those in the Augmented group (Original and Indications) were above the prolactin threshold (>18ng/mL for boys, >30ng/mL for girls) compared to the Basic group (52.9% Original Augmented vs. 3.7% Original Basic; 53.8% Augmented Indications 53.8% vs. 6.5% Basic Indications).

*Extrapyramidal symptoms.* Comparisons of AIMS and BARNES measures between treatment groups at Week 52 were not statistically significant. Most children obtained a score of zero for both outcomes.

**Table S5C:** Week 52 Prolactin Measure Comparisons Between Basic Versus Augmented

| Outcome Measure                         | Original Drug Class <sup>a</sup> |                                 |                | Indications <sup>b</sup>    |                                 |                |
|-----------------------------------------|----------------------------------|---------------------------------|----------------|-----------------------------|---------------------------------|----------------|
|                                         | <i>Basic</i><br><i>n=27</i>      | <i>Augmented</i><br><i>n=34</i> | <i>p Value</i> | <i>Basic</i><br><i>n=31</i> | <i>Augmented</i><br><i>n=39</i> | <i>p Value</i> |
| Prolactin (ng/mL), M (SD)               | 6.08 (4.19)                      | 21.56 (12.77)                   | <.0001         | 6.88 (7.06)                 | 22.35 (14.76)                   | <.0001         |
| Prolactin elevated threshold (1), n (%) |                                  |                                 |                |                             |                                 |                |
| No                                      | 26 (96.3)                        | 16 (47.1)                       | <.0001         | 29 (93.5)                   | 18 (46.2)                       | <.0001         |
| Yes                                     | 1 (3.7)                          | 18 (52.9)                       |                | 2 (6.5)                     | 21 (53.8)                       |                |
| Prolactin elevated threshold (2), n (%) |                                  |                                 |                |                             |                                 |                |
| No                                      | 27 (100.0)                       | 34 (100.0)                      | n/a            | 31 (100.0)                  | 38 (97.4)                       | 1.0000         |
| Yes                                     | 0 (0.0)                          | 0 (0.0)                         |                | 0 (0.0)                     | 1 (2.6)                         |                |

Note: Threshold definitions: (1) boys, > 18ng/mL; girls, > 30ng/mL and (2) Prolactin > 50ng/mL (boys or girls).

<sup>a</sup> Treatment group status at Week 52 defined in terms of the type of medication (i.e., drug class) that met our original criteria for Basic (stimulant) and Augmented (stimulant, atypical antipsychotic) but excludes children who were receiving any other types of concomitant psychotropic medication prescribed for problems other than attention-deficit/hyperactivity disorder (ADHD) or aggression.

<sup>b</sup> Treatment group status at Week 52 defined in terms of the type of medication (i.e., drug class) that met our original criteria for Basic (stimulant) and Augmented (stimulant, atypical antipsychotic) and includes children who were receiving concomitant psychotropic medication prescribed for problems (indications) other than ADHD or aggression.
